# Supplementary material for: Agricultural Subsidies, Production Certification and Green Pesticide Use Rate: Evidence from Experiments
Source: Preprints.org preprint supplement (doi:10.20944/preprints201902.0259.v1), 2019-02-27
Supplement: Supplementary file 1 [file supplementary]

## Sheet: experiment-data
Period	farmer	A	B	C	D
1	1	3	5	5	10
2	1	2	3	9	10
3	1	1	8	8	9
4	1	0	10	5	10
5	1	4	0	3	10
6	1	5	0	2	10
7	1	6	1	1	10
8	1	7	0	0	10
9	1	8	0	1	10
10	1	9	10	2	10
11	1	10	0	1	10
12	1	1	5	0	10
13	1	2	2	0	10
14	1	3	1	1	10
15	1	0	4	0	10
16	1	3	3	0	10
17	1	1	0	1	10
18	1	0	0	0	10
19	1	0	0	0	10
20	1	0	0	0	10
21	1	2	10	0	10
22	1	0	0	0	10
23	1	4	0	3	10
24	1	0	0	4	10
25	1	0	0	3	10
26	1	1	0	1	10
27	1	0	0	0	10
28	1	1	0	3	10
29	1	0	0	0	10
30	1	0	0	0	10
1	2	1	0	4	10
2	2	5	2	6	10
3	2	6	4	10	10
4	2	3	6	5	10
5	2	1	6	7	10
6	2	0	0	10	10
7	2	0	10	5	10
8	2	0	0	5	10
9	2	0	0	4	0
10	2	0	0	3	10
11	2	0	1	3	10
12	2	0	0	1	10
13	2	1	0	5	10
14	2	0	2	3	10
15	2	0	3	0	10
16	2	0	2	0	10
17	2	0	1	0	5
18	2	0	0	0	10
19	2	0	2	0	10
20	2	0	1	0	10
21	2	0	0	3	10
22	2	0	1	2	10
23	2	0	2	0	10
24	2	0	1	0	10
25	2	0	1	0	10
26	2	0	0	0	10
27	2	0	1	0	10
28	2	0	0	0	10
29	2	0	1	0	10
30	2	0	0	0	10
1	3	0	5	6	10
2	3	0	6	5	10
3	3	0	4	7	10
4	3	0	3	6	10
5	3	0	4	4	10
6	3	0	3	2	10
7	3	0	2	5	10
8	3	0	1	5	10
9	3	0	0	3	10
10	3	0	0	2	10
11	3	0	0	4	10
12	3	0	0	1	10
13	3	0	1	0	10
14	3	0	0	0	10
15	3	0	0	2	10
16	3	0	0	0	10
17	3	0	0	0	10
18	3	0	0	0	10
19	3	0	0	1	10
20	3	0	0	0	10
21	3	0	5	1	10
22	3	0	0	0	10
23	3	0	0	0	10
24	3	0	0	0	10
25	3	0	0	0	10
26	3	0	0	0	10
27	3	0	0	0	10
28	3	0	0	0	10
29	3	0	0	0	10
30	3	0	0	0	10
1	4	0	0	5	5
2	4	10	1	6	10
3	4	1	2	4	9
4	4	0	3	5	10
5	4	1	4	6	4
6	4	10	0	4	10
7	4	0	5	5	8
8	4	1	6	5	10
9	4	10	7	4	10
10	4	0	8	3	10
11	4	0	9	3	10
12	4	0	0	3	10
13	4	1	10	2	10
14	4	0	0	3	10
15	4	0	0	2	10
16	4	0	0	1	10
17	4	2	0	0	10
18	4	0	0	1	10
19	4	0	0	0	10
20	4	0	0	0	10
21	4	1	0	0	10
22	4	0	0	0	10
23	4	0	0	3	10
24	4	0	0	0	10
25	4	0	5	0	10
26	4	0	0	0	10
27	4	0	0	0	10
28	4	0	0	0	10
29	4	10	0	0	10
30	4	0	0	0	10
1	5	5	1	6	10
2	5	6	10	7	9
3	5	3	0	8	10
4	5	0	0	10	10
5	5	1	1	8	10
6	5	0	0	4	10
7	5	0	0	3	10
8	5	1	0	1	10
9	5	0	0	2	10
10	5	0	0	1	10
11	5	0	1	1	10
12	5	0	0	0	10
13	5	0	0	1	10
14	5	0	0	0	10
15	5	0	0	0	10
16	5	0	0	0	10
17	5	0	0	0	10
18	5	2	0	0	10
19	5	0	0	0	10
20	5	0	0	0	10
21	5	0	0	0	10
22	5	0	0	0	10
23	5	0	0	0	10
24	5	0	1	0	10
25	5	0	0	0	10
26	5	0	0	0	10
27	5	0	0	0	10
28	5	0	0	0	10
29	5	0	0	0	10
30	5	0	0	0	10
1	6	5	1	5	7
2	6	5	0	8	10
3	6	5	0	7	10
4	6	4	2	5	9
5	6	3	0	6	10
6	6	3	10	5	10
7	6	2	0	4	10
8	6	2	0	3	10
9	6	0	1	2	10
10	6	0	0	1	10
11	6	1	0	2	10
12	6	0	5	2	10
13	6	0	0	1	10
14	6	0	0	1	10
15	6	0	0	2	10
16	6	0	0	1	10
17	6	0	0	1	10
18	6	0	1	1	10
19	6	0	0	1	10
20	6	0	0	1	10
21	6	0	0	1	10
22	6	0	0	1	10
23	6	0	0	1	5
24	6	0	0	1	10
25	6	0	0	1	10
26	6	0	0	1	10
27	6	0	0	1	10
28	6	0	0	1	10
29	6	0	0	1	10
30	6	0	0	1	10
1	7	0	2	6	10
2	7	5	0	5	10
3	7	10	0	4	10
4	7	2	3	2	10
5	7	1	4	3	10
6	7	0	3	3	10
7	7	0	5	4	10
8	7	0	3	1	10
9	7	0	3	0	10
10	7	0	3	3	10
11	7	0	10	1	10
12	7	1	3	1	10
13	7	0	3	0	10
14	7	0	3	0	10
15	7	0	1	2	10
16	7	0	1	0	10
17	7	0	1	0	10
18	7	0	2	0	10
19	7	0	3	0	10
20	7	0	0	0	10
21	7	0	0	0	10
22	7	0	0	0	10
23	7	0	0	0	10
24	7	0	0	0	10
25	7	0	0	0	10
26	7	0	0	0	10
27	7	1	0	0	10
28	7	0	0	0	10
29	7	0	0	0	10
30	7	0	0	0	10
1	8	0	6	7	8
2	8	0	0	8	10
3	8	0	0	9	10
4	8	0	1	10	10
5	8	0	1	5	10
6	8	0	10	4	10
7	8	0	10	3	10
8	8	0	10	2	10
9	8	0	0	2	10
10	8	0	0	1	10
11	8	0	0	2	10
12	8	0	0	2	10
13	8	0	0	0	10
14	8	0	0	0	10
15	8	0	0	0	10
16	8	0	0	0	10
17	8	0	0	3	10
18	8	0	0	0	10
19	8	0	1	0	10
20	8	0	2	0	10
21	8	0	3	0	10
22	8	0	0	0	10
23	8	0	0	1	10
24	8	0	0	3	10
25	8	0	0	0	10
26	8	0	0	0	10
27	8	0	0	0	10
28	8	0	0	0	10
29	8	0	0	0	10
30	8	0	0	0	10
1	9	5	3	5	10
2	9	6	10	6	10
3	9	10	0	7	10
4	9	0	1	8	10
5	9	0	0	6	10
6	9	0	0	5	10
7	9	0	5	4	10
8	9	0	0	3	10
9	9	0	0	2	10
10	9	0	0	1	10
11	9	0	0	2	10
12	9	0	0	3	10
13	9	0	0	4	10
14	9	0	0	5	10
15	9	0	0	0	10
16	9	0	0	1	10
17	9	0	0	0	10
18	9	0	0	0	10
19	9	0	0	0	10
20	9	0	0	0	10
21	9	0	0	0	10
22	9	10	0	1	10
23	9	0	0	1	10
24	9	0	0	0	10
25	9	0	0	2	10
26	9	0	0	0	10
27	9	0	0	1	10
28	9	0	0	0	10
29	9	0	0	0	10
30	9	0	0	0	10
1	10	10	10	6	10
2	10	0	8	4	9
3	10	0	5	3	10
4	10	1	6	2	10
5	10	0	7	1	9
6	10	0	5	0	5
7	10	0	3	1	10
8	10	0	2	0	10
9	10	0	0	0	10
10	10	0	1	0	2
11	10	0	0	0	10
12	10	0	1	1	10
13	10	0	1	3	10
14	10	0	0	4	10
15	10	0	3	5	10
16	10	0	2	8	10
17	10	0	2	6	10
18	10	0	1	3	10
19	10	0	0	1	10
20	10	0	1	1	10
21	10	0	1	0	10
22	10	0	3	0	10
23	10	0	2	0	10
24	10	0	1	0	10
25	10	0	2	0	10
26	10	0	2	0	10
27	10	0	2	0	10
28	10	0	3	0	10
29	10	1	1	0	10
30	10	0	0	0	10
1	11	0	5	5	10
2	11	2	4	3	10
3	11	4	3	8	10
4	11	6	5	10	5
5	11	6	6	0	7
6	11	0	5	0	10
7	11	10	4	1	5
8	11	0	3	0	5
9	11	0	1	0	10
10	11	0	0	10	10
11	11	1	0	0	10
12	11	0	1	5	10
13	11	0	3	2	10
14	11	2	4	1	10
15	11	3	5	4	10
16	11	2	8	3	10
17	11	1	6	0	10
18	11	0	3	0	10
19	11	2	1	0	10
20	11	1	0	0	10
21	11	0	0	10	10
22	11	1	0	0	10
23	11	2	0	0	10
24	11	1	0	0	10
25	11	1	0	0	10
26	11	0	0	0	10
27	11	1	0	0	10
28	11	0	0	0	10
29	11	1	0	0	10
30	11	0	0	0	10
1	12	0	5	5	10
2	12	1	1	6	9
3	12	2	9	4	8
4	12	3	0	3	10
5	12	4	0	4	10
6	12	0	0	3	10
7	12	5	0	2	10
8	12	6	0	1	5
9	12	7	0	0	10
10	12	8	0	0	10
11	12	9	0	0	10
12	12	0	0	0	10
13	12	10	0	1	10
14	12	0	0	0	10
15	12	0	0	0	10
16	12	0	0	0	10
17	12	0	0	0	10
18	12	0	0	0	10
19	12	0	0	0	10
20	12	0	0	0	10
21	12	0	0	5	10
22	12	0	0	0	10
23	12	0	0	0	10
24	12	0	0	0	10
25	12	5	0	0	10
26	12	0	0	0	10
27	12	0	0	0	10
28	12	0	0	0	10
29	12	0	0	0	10
30	12	0	0	0	10
1	13	1	9	1	10
2	13	0	8	10	5
3	13	0	7	0	7
4	13	2	5	0	6
5	13	0	3	1	9
6	13	10	1	0	10
7	13	0	0	0	10
8	13	0	0	0	10
9	13	1	0	0	10
10	13	0	0	0	10
11	13	0	0	1	10
12	13	5	0	0	10
13	13	0	0	0	10
14	13	0	0	0	10
15	13	0	0	0	10
16	13	0	0	0	10
17	13	0	0	0	10
18	13	1	0	0	10
19	13	0	0	0	10
20	13	0	0	0	10
21	13	0	0	0	10
22	13	0	0	0	10
23	13	0	0	0	10
24	13	0	0	1	10
25	13	0	0	0	10
26	13	0	0	0	10
27	13	0	0	0	10
28	13	0	0	0	10
29	13	0	0	0	10
30	13	0	0	0	10
1	14	2	10	6	10
2	14	0	3	0	8
3	14	0	0	0	7
4	14	3	10	1	5
5	14	4	1	1	6
6	14	3	0	10	10
7	14	5	0	10	9
8	14	3	3	10	10
9	14	3	2	0	10
10	14	3	1	0	10
11	14	10	0	0	10
12	14	3	5	0	10
13	14	3	0	0	10
14	14	3	0	0	10
15	14	1	0	0	10
16	14	1	0	0	10
17	14	1	0	0	10
18	14	2	1	0	10
19	14	3	0	1	10
20	14	0	0	2	10
21	14	0	0	3	10
22	14	0	0	0	10
23	14	0	0	0	10
24	14	0	0	0	10
25	14	0	0	0	10
26	14	0	0	0	10
27	14	0	0	0	10
28	14	0	0	0	10
29	14	0	0	0	10
30	14	0	0	0	10
1	15	3	7	10	8
2	15	10	10	8	10
3	15	0	10	5	8
4	15	1	7	6	9
5	15	0	8	7	10
6	15	0	9	5	9
7	15	5	10	3	10
8	15	0	5	2	10
9	15	0	4	0	10
10	15	0	3	1	10
11	15	0	0	0	10
12	15	0	0	1	10
13	15	0	0	1	10
14	15	0	10	0	10
15	15	0	0	3	10
16	15	0	0	2	10
17	15	0	7	2	10
18	15	0	0	1	10
19	15	0	0	0	10
20	15	0	0	1	10
21	15	0	0	1	10
22	15	0	0	3	10
23	15	0	0	2	10
24	15	0	0	1	10
25	15	0	0	2	10
26	15	0	0	2	10
27	15	0	0	2	10
28	15	0	0	3	10
29	15	0	0	1	10
30	15	0	0	0	10

## Sheet: questionaire-data
	Average input	subsidy	certification	gender	age	region	experiment	diseases-pests	green-pesticide	necessity	willing	certified-product	risk-characteristics
	y	x1	x2	x3	x4	x5	x6	x7	x8	x9	x10	x11	x12
A	2.43333	0	0	1	22	1	0	1	1	1	2	1	1
A	0.566667	0	0	0	21	0	2	2	2	1	0	0	1
A	0	0	0	0	23	0	3	1	1	1	0	0	1
A	1.56667	0	0	0	24	0	2	2	1	1	1	0	1
A	0.6	0	0	0	21	0	1	1	1	1	1	3	1
A	1	0	0	0	21	1	2	1	2	1	1	0	1
A	0.666667	0	0	1	22	0	4	3	3	1	1	1	1
A	0	0	0	0	20	0	3	1	1	1	0	1	2
A	1.03333	0	0	0	21	0	3	2	1	1	2	2	1
A	0.4	0	0	1	21	0	1	0	1	1	1	1	0
A	1.56667	0	0	0	19	0	2	1	2	1	2	1	1
A	2	0	0	0	20	0	2	1	1	1	2	3	1
A	0.666667	0	0	0	20	0	2	1	1	1	0	1	1
A	1.76667	0	0	0	23	1	1	1	2	1	0	0	2
A	0.633333	0	0	0	23	1	1	0	0	1	0	0	2
B	2.067	0	1	0	23	0	2	0	1	1	1	1	1
B	1.567	0	1	1	23	0	1	1	2	1	2	1	0
B	1.133	0	1	0	24	0	1	1	1	0	1	1	0
B	2	0	1	0	24	0	1	1	1	1	1	0	1
B	0.467	0	1	0	20	0	1	1	1	1	0	0	2
B	0.667	0	1	0	24	0	1	2	2	1	1	0	2
B	1.767	0	1	1	25	0	1	0	0	1	0	3	2
B	1.467	0	1	0	22	1	3	2	2	1	2	1	0
B	0.633	0	1	0	20	0	1	1	1	1	0	0	2
B	2.5	0	1	0	26	0	1	2	2	1	2	2	1
B	2.233	0	1	0	19	1	2	2	2	1	1	0	1
B	0.5	0	1	0	18	0	2	2	1	1	0	0	1
B	1.1	0	1	0	25	0	3	2	1	1	2	0	1
B	1.2	0	1	1	22	0	1	1	2	1	0	1	2
B	3	0	1	0	24	0	1	1	1	1	1	3	0
C	1.767	1	0	0	19	0	1	1	2	1	1	1	2
C	2.533	1	0	1	27	0	2	3	2	1	0	1	1
C	1.8	1	0	0	21	0	1	3	2	1	2	0	1
C	2.167	1	0	1	20	0	0	0	0	1	1	0	0
C	1.733	1	0	1	22	0	2	2	2	1	0	3	2
C	2.3	1	0	0	20	0	2	1	1	1	0	0	0
C	1.167	1	0	0	21	1	0	2	1	1	2	0	1
C	2.067	1	0	0	21	1	1	2	2	1	1	0	2
C	2.223	1	0	0	21	1	1	2	0	1	1	1	1
C	1.633	1	0	0	21	1	1	1	1	1	1	0	2
C	2.067	1	0	0	20	0	3	1	2	1	0	0	2
C	1.133	1	0	0	20	1	1	2	1	1	1	2	1
C	0.467	1	0	1	25	1	3	1	1	1	1	1	1
C	1.467	1	0	0	20	0	2	1	1	1	0	1	1
C	2.5	1	0	0	21	1	0	2	1	1	0	0	2
D	9.96667	1	1	0	18	1	2	1	2	1	0	0	2
D	9.5	1	1	0	25	0	2	3	1	1	0	1	1
D	10	1	1	0	23	0	3	3	1	1	0	1	2
D	9.53333	1	1	0	20	0	3	1	3	1	1	1	0
D	9.96667	1	1	0	24	1	2	2	2	1	0	0	2
D	9.7	1	1	0	20	1	2	2	2	0	2	0	0
D	10	1	1	0	24	0	1	1	1	1	2	0	1
D	9.93333	1	1	1	25	0	1	2	2	1	0	3	2
D	10	1	1	1	26	1	0	1	3	1	0	1	1
D	9.5	1	1	0	21	1	2	1	2	1	1	2	2
D	9.4	1	1	0	24	0	1	1	1	1	1	3	0
D	9.733	1	1	0	24	0	2	1	1	1	2	0	0
D	9.567	1	1	0	18	0	2	2	1	1	0	0	1
D	9.5	1	1	0	25	0	3	2	1	1	2	0	1
D	9.8	1	1	1	22	0	1	1	2	1	0	1	2
